# Supplementary material for: Pyridine derivative/graphene nanoribbon composites as molecularly tunable heterogeneous electrocatalysts for the oxygen reduction reaction
Source: Royal Society of Chemistry journal article supplement (doi:10.1039/c5cp07463k), 2016-01-01
Supplement: c5cp07463k1.pdf [file c5cp07463k1.pdf]

## Supporting Information

### **Pyridine Derivatives/Graphene Nanoribbon Composites as Molecularly Tunable Heterogeneous Electrocatalysts for Oxygen Reduction Reaction**

Huiying Zhang,<sup>†</sup> Jingxiang Zhao,<sup>†,‡,\*</sup> Qinghai Cai<sup>†</sup>

<sup>†</sup> *Key Laboratory of Photonic and Electronic Bandgap Materials, Ministry of Education, Harbin Normal University, Harbin, 150025, China*

<sup>‡</sup> *College of Chemistry and Chemical Engineering, Harbin Normal University, Harbin 150025, China*

\* To whom correspondence should be addressed. Email: xjz\_hmily@163.com (J.X.)

**Table S1.** Computed adsorption energies of ORR species on pyridine-functionalized graphene nanoribbon with models.

|              | $E_{\text{ads}}(\text{OOH})$ | $E_{\text{ads}}(\text{O})$ | $E_{\text{ads}}(\text{OH})$ |
|--------------|------------------------------|----------------------------|-----------------------------|
| small model  | -0.33                        | -3.92                      | -1.64                       |
| larger model | -0.33                        | -3.95                      | -1.66                       |

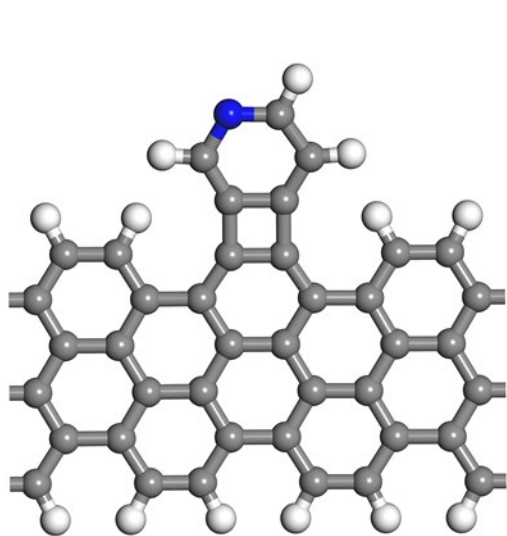

small model

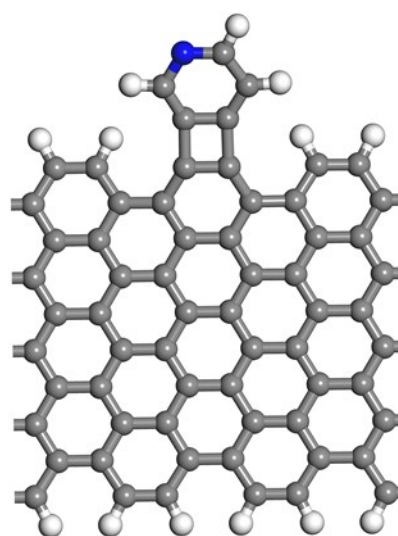

large model

**Table S2.** Computed adsorption energies of ORR species on pyridine-functionalized graphene nanoribbon by employing different  $k$  points.

|                       | $E_{\text{ads}}(\text{OOH})$ | $E_{\text{ads}}(\text{O})$ | $E_{\text{ads}}(\text{OH})$ |
|-----------------------|------------------------------|----------------------------|-----------------------------|
| $1 \times 1 \times 5$ | -0.33                        | -3.92                      | -1.64                       |
| $1 \times 1 \times 6$ | -0.32                        | -3.90                      | -1.64                       |
| $1 \times 1 \times 7$ | -0.32                        | -3.90                      | -1.64                       |
| $1 \times 1 \times 8$ | -0.31                        | -3.89                      | -1.64                       |

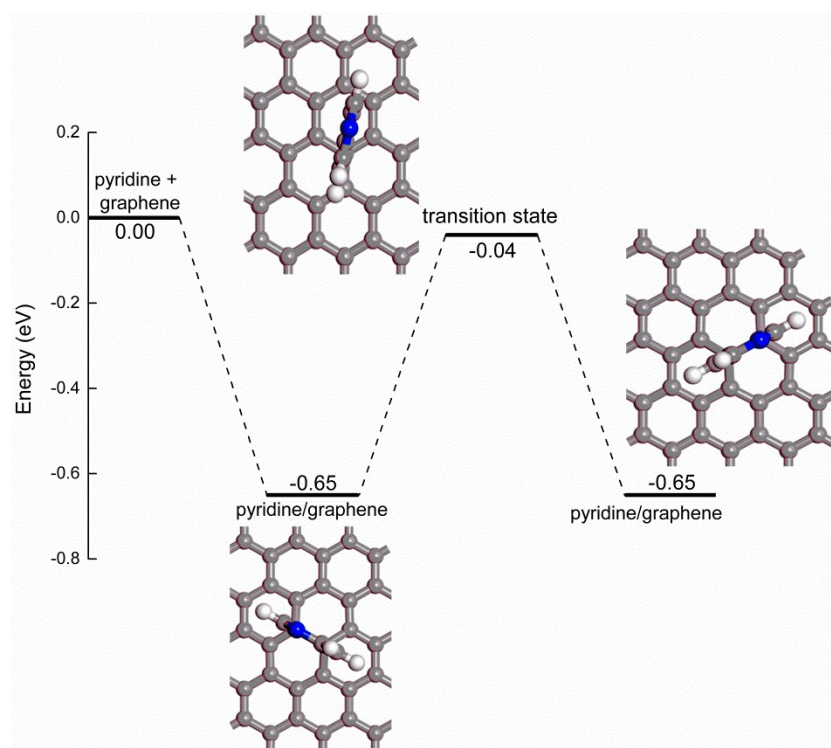

**Fig. S1.** The diffusion pathway of the adsorbed pyridine on pristine graphene.

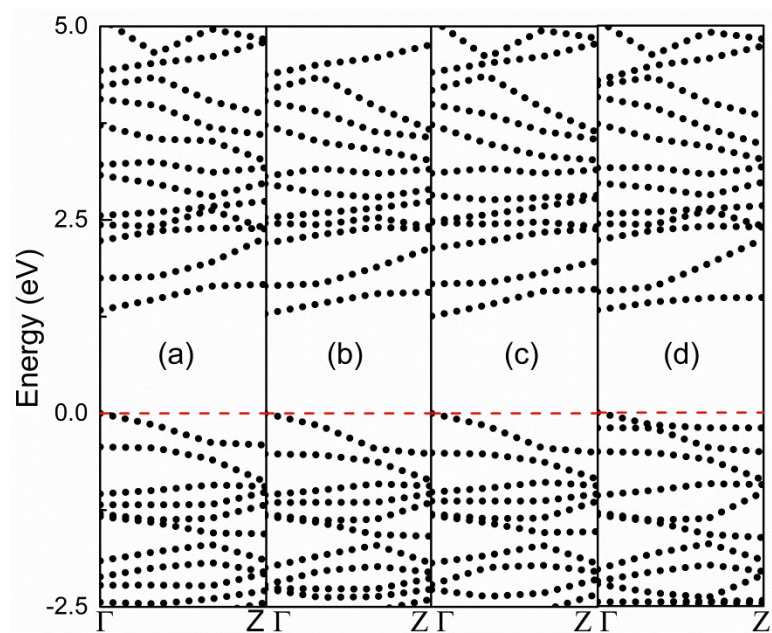

**Fig. S2.** The computed band structures of (a) pyridine, (b) pyridazine, (c) pyrimidine, and (d) pyrazine on the edge sites of graphene nanoribbon.
